# Supplementary material for: Characteristics of PM 2.5 mass concentrations and chemical species in urban and background areas of China: emerging results from the CARE-China network
Source: Copernicus journal article supplement (doi:10.5194/acp-18-8849-2018), 2018-06-22
Supplement: Supplementary file 1 [file acp-18-8849-2018-supplement.pdf]

Supplement of Atmos. Chem. Phys., 18, 8849–8871, 2018  
<https://doi.org/10.5194/acp-18-8849-2018-supplement>  
© Author(s) 2018. This work is distributed under  
the Creative Commons Attribution 4.0 License.

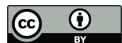

*Supplement of*

## **Characteristics of PM<sub>2.5</sub> mass concentrations and chemical species in urban and background areas of China: emerging results from the CARE-China network**

**Zirui Liu et al.**

*Correspondence to:* Zirui Liu ([liuzirui@mail.iap.ac.cn](mailto:liuzirui@mail.iap.ac.cn)) and Yuesi Wang ([wys@mail.iap.ac.cn](mailto:wys@mail.iap.ac.cn))

The copyright of individual parts of the supplement might differ from the CC BY 4.0 License.

Table S1 Configuration of PM<sub>2.5</sub> measurements for the forty stations in this study

| Station/Code          | Measurement method               | Online measurement period | Filter sampling period |
|-----------------------|----------------------------------|---------------------------|------------------------|
| Beijing/BJC           | TEOM and Gravimetric             | Jan. 2012 - Dec. 2014     | Apr. 2012 - Dec. 2013  |
| Cele/CLD              | TEOM                             | Jan. 2012 - Dec. 2014     |                        |
| Changbai Mountain/CBM | TEOM and Gravimetric             | Jan. 2012 - Dec. 2014     | May 2012 - Jun. 2013   |
| Changsha/CSC          | TEOM                             | Jan. 2012 - Dec. 2014     |                        |
| Chengdu/CDC           | Beta attenuation                 | Jan. 2012 - Dec. 2014     |                        |
| Chongqing/CQC         | TEOM and Gravimetric             | Jan. 2012 - Dec. 2014     | Apr. 2012 - May 2013   |
| Dinghu Mountain/DHM   | TEOM and Gravimetric             | Jan. 2012 - Dec. 2014     | Dec. 2012 - Oct. 2013  |
| Dunhuang/DHD          | TEOM                             | Jan. 2012 - Dec. 2014     |                        |
| Fukang/FKZ            | TEOM                             | Jan. 2012 - Dec. 2014     |                        |
| Gongga Mountain/GGM   | TEOM and Gravimetric             | May 2012 - Dec. 2014      | Apr. 2012 - Mar. 2013  |
| Guangzhou/GZC         | Beta attenuation and Gravimetric | Apr. 2012 - Dec.2014      | Jun. 2013 - Apr. 2014  |
| Hailun/HLA            | TEOM                             | Jan. 2012 - Dec. 2014     |                        |
| Hefei/HFC             | TEOM                             | Apr. 2012 - Dec. 2014     |                        |
| Ji'nan/JNC            | TEOM                             | Jan. 2012 - Dec. 2014     |                        |
| Kunming/KMC           | TEOM                             | Mar. 2012 - Dec. 2014     |                        |
| Lhasa/LSZ             | TEOM and Gravimetric             | Mar.2012 - Mar. 2014      | Apr.2012 - Jul. 2013   |
| Lin'an/LAZ            | TEOM and Gravimetric             | Jan. 2012 - Dec. 2014     | Dec. 2014 - Nov. 2015  |
| Mount Everest/ZFM     | TEOM                             | Mar. 2012 - Jan. 2014     |                        |
| Namtso/NMT            | TEOM and Gravimetric             | Jan.2012 - Mar. 2014      | May 2012 - Mar. 2013   |
| Nagri/ALZ             | TEOM                             | Apr. 2012 - Sep. 2012     |                        |
| Qianyanzhou/QYZ       | TEOM                             | Feb.2012 - Dec. 2014      |                        |
| Qinghai Lake/QHL      | Beta attenuation                 | Jan. 2012 - Oct. 2014     |                        |
| Sanya/SYB             | TEOM                             | Jan. 2012 - Oct. 2013     |                        |
| Shanghai/SHC          | Beta attenuation and Gravimetric | Jan. 2012 - Dec. 2014     | Dec. 2011 - Nov. 2012  |
| Shapotou/SPD          | TEOM                             | Jan. 2012 - Dec. 2014     |                        |
| Shenyang/SYC          | TEOM and Gravimetric             | Jan. 2012 - Dec. 2014     | May 2012 - Jan. 2013   |
| Shijiazhuang/SJZ      | TEOM                             | Jan. 2012 - Dec. 2014     |                        |
| Taipei/TBC            | TEOM                             | Jan. 2012 - Dec. 2014     |                        |
| Taiyuan/TYC           | TEOM                             | Mar. 2012 - Dec. 2014     |                        |
| Tianjin/TJC*          | TEOM                             | Jan. 2012 - Dec. 2014     |                        |
| Tongyu/TYZ            | TEOM                             | Feb. 2012 - May 2014      |                        |
| Urumchi/URC           | Beta attenuation                 | Jan.2012 - Dec.2014       |                        |
| Wuxi/WXC              | TEOM                             | Feb. 2012 - Dec. 2014     |                        |
| Xi'An/XAC             | Beta attenuation                 | Jan. 2012 - Dec. 2014     |                        |
| Xianghe/XHZ           | TEOM                             | Jan. 2012 - Dec. 2014     |                        |
| Xinglong/XLZ          | TEOM and Gravimetric             | Jan. 2012 - Dec. 2014     | Aug. 2012 - Oct. 2014  |
| Xishuangbanna/BNF     | TEOM                             | Apr.2012 - Apr.2014       |                        |
| Yantai/YTZ            | TEOM                             | Mar.2012 - Dec. 2014      |                        |
| Yucheng/YCA           | TEOM                             | Jan. 2012 - Dec. 2014     |                        |
| Zangdongnan/ZDN       | TEOM                             | Mar. 2012 - Mar. 2014     |                        |

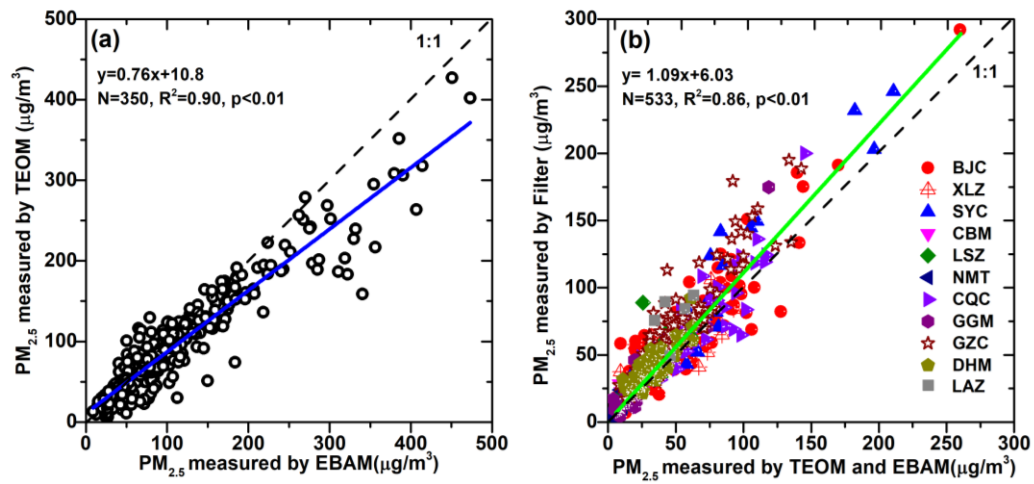

Fig. S1 (a) Intercomparison of PM<sub>2.5</sub> mass concentrations measured by the tapered element oscillating microbalance (TEOM) and the beta gauge instruments (EBAM) conducted at the Beijing site; (b) Intercomparison of PM<sub>2.5</sub> mass concentrations measured by filter sampling and the on-line instruments (TEOM and EBAM) from the 11 sites during the one-year observation period. (the code related to the observation sites could be found in Table S1)

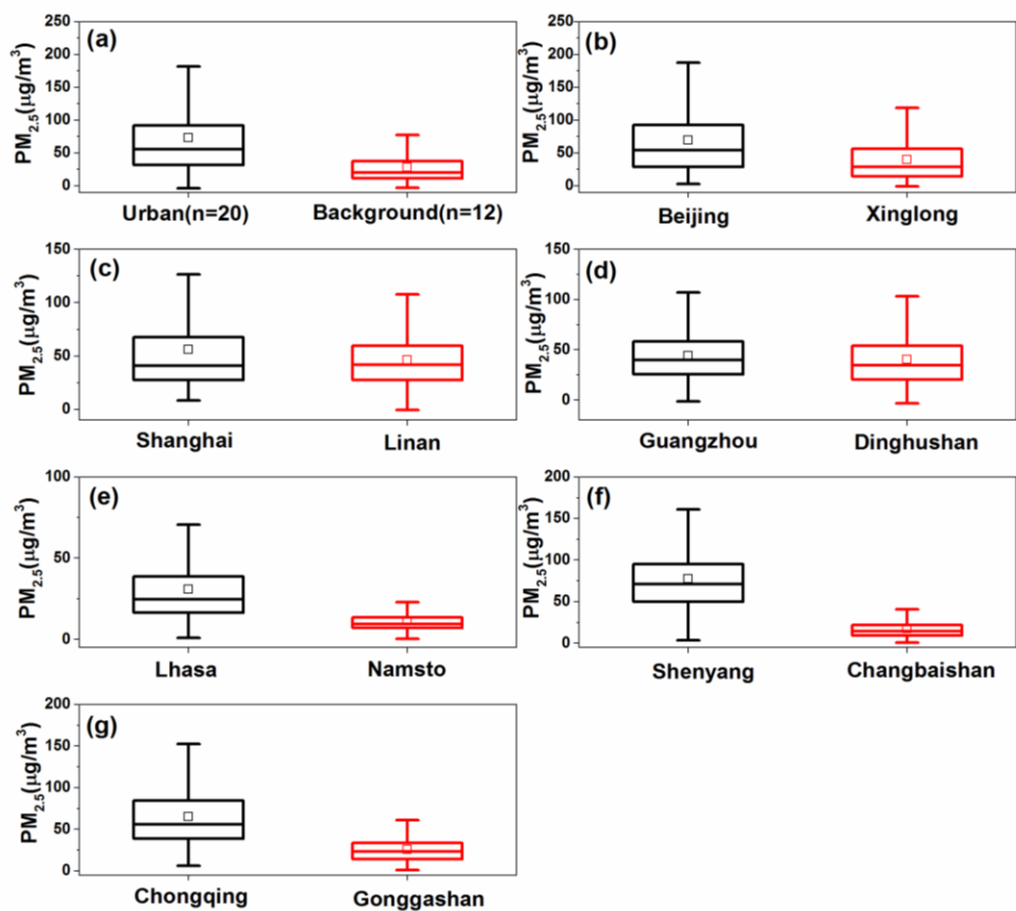

Fig.S2. Summary of PM<sub>2.5</sub> concentration at background (n=12) and urban (n=20) sites. The box shows the median and the upper and lower quartiles, with the mean shown by the square. The lines extending from the box represent the upper and lower bounds of ±standard deviation.

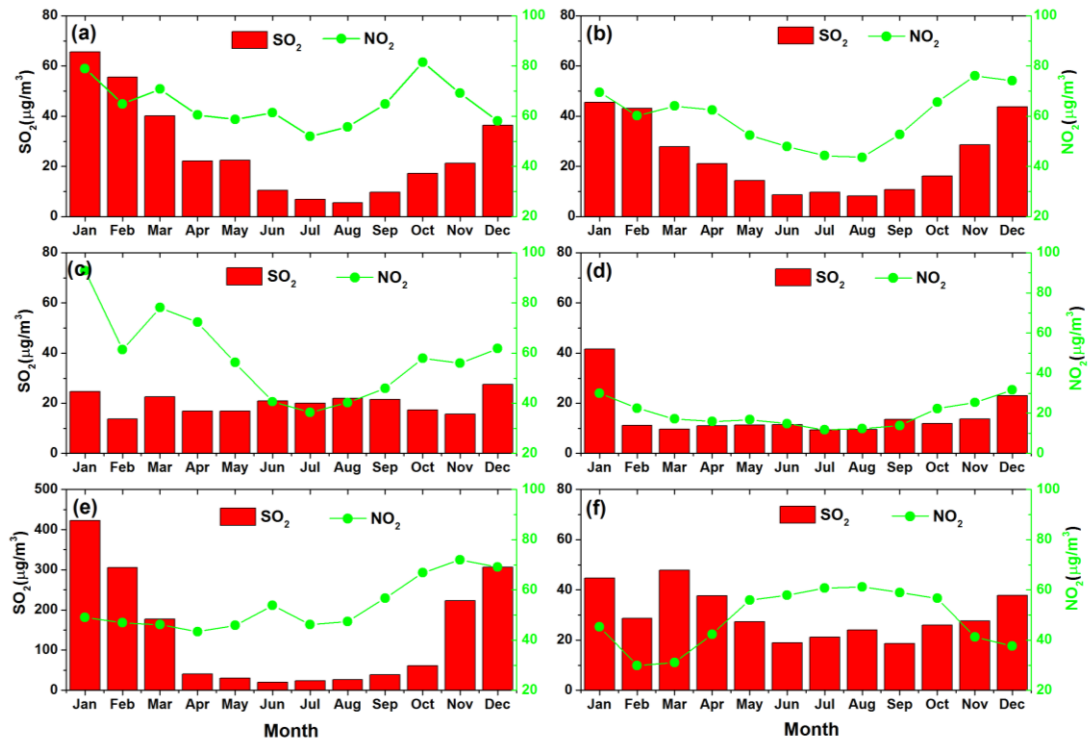

Fig.S3. Monthly average SO<sub>2</sub> concentration (histogram, left coordinate) and the monthly average NO<sub>2</sub> concentration (dotted line, right coordinate) during 2013-2014 in (a)Beijing, (b)Shanghai, (c) Guangzhou, (d)Lhasa , (e) Shenyang and (f) Chongqing.

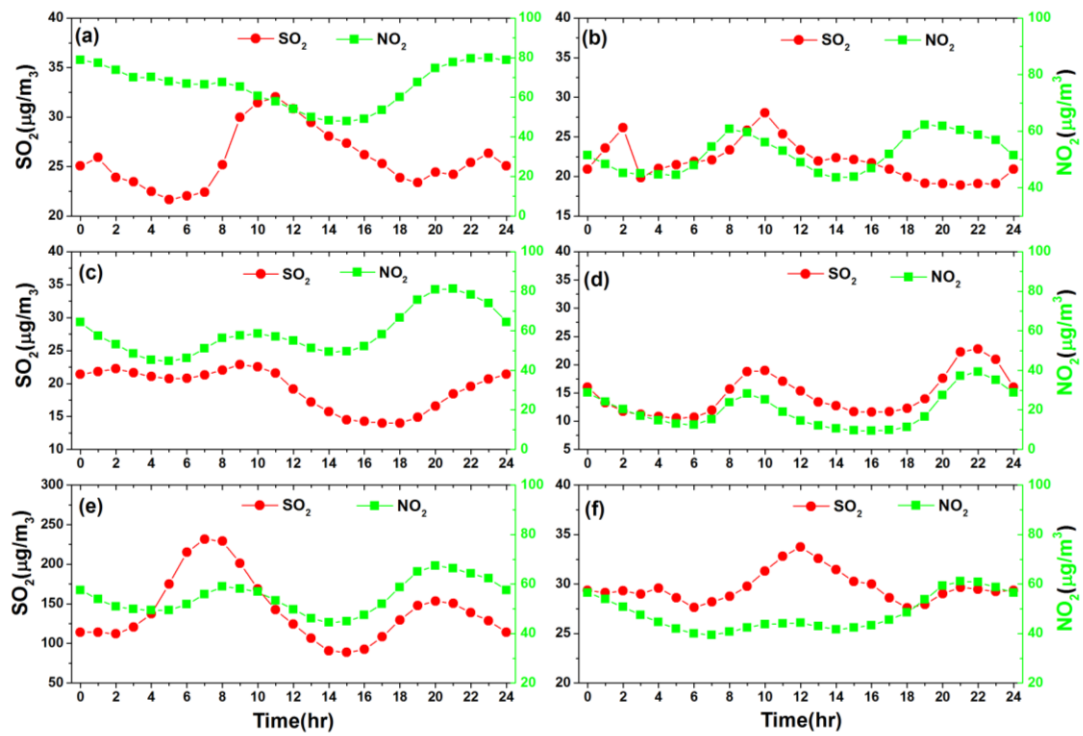

Fig.S4. Diurnal cycles of SO<sub>2</sub> concentration (dotted red line, left coordinate) and NO<sub>2</sub> concentration (dotted green line, right coordinate) during 2013-2014 in (a)Beijing, (b)Shanghai, (c) Guangzhou, (d)Lhasa , (e) Shenyang and (f) Chongqing.

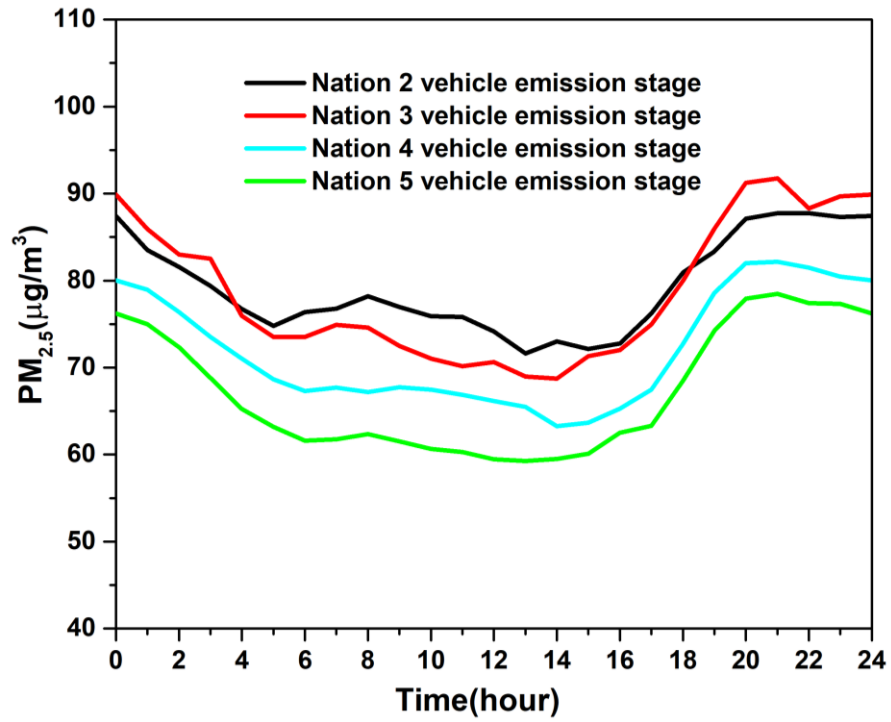

Fig.S5 Diurnal variation of PM<sub>2.5</sub> in Beijing during the four kinds of vehicle emission standard stages. PM<sub>2.5</sub> data obtained during Nation 2 vehicle emission stage (Nation 2) in this study refer to the periods of Jan. 2004 to Nov. 2005. Nation 3 refer to the periods of Dec. 2005 to Feb. 2008. Nation 4 refer to the periods of Mar. 2008 to Jan. 2013. Nation 5 refer to the periods of Feb. 2013 to Dec. 2014.
